# MedPodGPT: A multilingual audio-augmented large language model for medical research and education

Shuyue Jia<sup>1,\*</sup>, Subhrangshu Bit<sup>2,\*</sup>, Edward Searls<sup>3,\*</sup>, Lindsey A. Claus<sup>3,4,†</sup>, Pengrui Fan<sup>2,†</sup>, Varuna H. Jasodanand<sup>3,†</sup>, Meagan V. Lauber<sup>3,†</sup>, Divya Veerapaneni<sup>3,5,†</sup>, William M. Wang<sup>2,†</sup>, Rhoda Au<sup>3,6,7,8,9,10</sup> & Vijaya B. Kolachalama<sup>2,3,11,‡</sup>

<sup>1</sup>*Department of Electrical & Computer Engineering, Boston University, MA, USA*

<sup>2</sup>*Department of Computer Science, Boston University, MA, USA*

<sup>3</sup>*Department of Medicine, Boston University Chobanian & Avedisian School of Medicine, Boston, MA, USA*

<sup>4</sup>*Department of Surgery, Hospital of the University of Pennsylvania, Philadelphia, PA, USA*

<sup>5</sup>*Department of Neurology, The University of Texas Southwestern Medical Center, Dallas, TX, USA*

<sup>6</sup>*Department of Anatomy and Neurobiology, Boston University Chobanian & Avedisian School of Medicine, Boston, MA, USA*

<sup>7</sup>*The Framingham Heart Study, Boston University Chobanian & Avedisian School of Medicine, Boston, MA, USA*

<sup>8</sup>*Department of Neurology, Boston University Chobanian & Avedisian School of Medicine, Boston, MA, USA*

<sup>9</sup>*Boston University Alzheimer's Disease Research Center, Boston, MA, USA*

<sup>10</sup>*Department of Epidemiology, Boston University School of Public Health, Boston, MA, USA*

<sup>11</sup>*Faculty of Computing & Data Sciences, Boston University, MA, USA*

\* These authors contributed equally to this work

† Listed in alphabetical order

‡ Corresponding author: Vijaya B. Kolachalama, PhD; Email: [vkola@bu.edu](mailto:vkola@bu.edu); ORCID: <https://orcid.org/0000-0002-5312-8644>

## 1 **Abstract**

2 The proliferation of medical podcasts has generated an extensive repository of audio content, rich in spe-  
3 cialized terminology, diverse medical topics, and expert dialogues. Here we introduce a computational  
4 framework designed to enhance large language models (LLMs) by leveraging the informational content  
5 of publicly accessible medical podcast data. This dataset, comprising over 4,300 hours of audio content,  
6 was transcribed to generate over 39 million text tokens. Our model, MedPodGPT, integrates the varied di-  
7 alogue found in medical podcasts to improve understanding of natural language nuances, cultural contexts,  
8 and medical knowledge. Evaluated across multiple benchmarks, MedPodGPT demonstrated an average im-  
9 provement of 2.31% over standard open-source benchmarks and showcased an improvement of 2.58% in its  
10 zero-shot multilingual transfer ability, effectively generalizing to different linguistic contexts. By harness-  
11 ing the untapped potential of podcast content, MedPodGPT advances natural language processing, offering  
12 enhanced capabilities for various applications in medical research and education.

1 The emergence of generative artificial intelligence (AI), particularly through the development of large  
2 language models (LLMs), has marked a significant progression in data analysis and interpretation. Trained  
3 on extensive text corpora, these models have demonstrated their ability to generate contextually rich and  
4 accurate content, showcasing advanced analytical prowess. Notable achievements, such as GPT-4's per-  
5 formance in medical examinations, underscore the potential of LLMs to revolutionize various disciplines,  
6 including medicine <sup>1</sup>. Amid these advancements, the proliferation of medical podcasts has introduced a vast  
7 collection of audio content, rich in medical terminology, topic diversity, and expert dialogues. This burgeon-  
8 ing trend not only serves as a medium for disseminating the latest medical knowledge but also provides a  
9 unique opportunity to mine linguistic patterns and domain-specific knowledge, enhancing the capabilities of  
10 language models within the healthcare and clinical sectors.

11 Multimodal foundation models in medicine represent a significant leap forward, merging textual in-  
12 formation with intricate data forms like medical imaging. These models excel in synthesizing and producing  
13 content that seamlessly integrates text and visuals, enhancing the comprehension of radiological and patho-  
14 logical imagery <sup>2-6</sup>. By training on comprehensive datasets that combine medical narratives with related  
15 visual elements, these models facilitate a deeper understanding of complex medical phenomena, thus im-  
16 proving diagnostic accuracy and the quality of medical education <sup>4</sup>. The integration of various data modal-  
17 ities, such as audio content from medical podcasts and lectures, pioneers a promising direction to refine  
18 language models' precision and relevance to the medical domain. Given the substantial progress in audio  
19 transcription technologies, there is a ripe opportunity to develop audio-linguistic foundation models that ad-  
20 vance existing large language model capabilities. Such advancements could significantly enhance medical  
21 research and education.

22 In this work, we developed MedPodGPT, a computational framework designed to enhance language  
23 models by leveraging the depth of linguistic and informational content inherent in medical podcasts. It inte-  
24 grates the diverse dialogues from these podcasts to enhance its capability to interpret complex medical infor-  
25 mation and generate contextually informed content. MedPodGPT is pretrained on a vast corpus of podcast  
26 transcripts, encompassing specialized academic discussions. This database allows MedPodGPT to capture a  
27 wide range of linguistic styles and terminologies in the medical field, thus refining its ability to process and  
28 generate relevant texts. The development of MedPodGPT not only aligns with the complex nature of medi-  
29 cal communication but also signifies a major step toward more informed research and educational purposes.  
30 By leveraging the untapped potential of medical podcasts, MedPodGPT can foster significant advancements  
31 in medical language understanding, ultimately enhancing the quality and popularity of medical and clinical  
32 knowledge.

## 1 **Methods**

2 **Dataset description** We curated a diverse collection of multilingual medical podcasts encompassing  
3 various types of medical knowledge. These podcasts are primarily created by biomedical and clinical jour-  
4 nals, medical exam preparation organizations, and clinician educators, aiming to teach medical students,  
5 resident physicians, and other learners about different aspects of medical practice. To ensure a broad lin-  
6 guistic perspective, we collected publicly available podcasts in English, Spanish, and French, which rank  
7 among the top 5 most widely spoken languages in the world. This collection offers high-quality content that  
8 covers cultural ethics and inclusion, natural language nuances, medical knowledge, and clinical practices,  
9 thus potentially advancing the understanding and translation of medical science. Specifically, the medical  
10 podcast data was selected and filtered based on the following criteria: (1) Podcasts hosted by reputable sci-  
11 entific, medical, and clinical journals. (2) Podcasts aimed at preparing medical students for standardized  
12 medical examinations that are hosted by physicians, medical professionals, or organizations. (3) Podcasts  
13 produced by individuals with medical expertise, including Medical Doctors (M.D.) or Doctors of Philosophy  
14 (Ph.D.), discussing clinical and medical knowledge to educate medical students and residents. Finally, med-  
15 ical experts on our team reviewed each podcast to ensure the topics were limited to didactic medicine and  
16 clinical practice. The complete set of podcast episodes, along with relevant metadata, is detailed in Table 1.

17 **Dataset processing** The pretraining corpus for MedPodGPT consisted of thousands of hours of medical  
18 podcasts, encompassing academic discussions, clinical case studies, and expert interviews. We transcribed  
19 these audio files using the state-of-the-art automatic speech recognition model, OpenAI Whisper <sup>7</sup>. Built  
20 upon an encoder-decoder Transformer architecture, the Whisper model resampled the input audio to 16,000  
21 Hz and performed temporal chunking. Then, these chunks of audio data were represented by 80-channel  
22 log-magnitude Mel spectrograms with a 25-millisecond window and 10-millisecond stride. Before being  
23 processed by the Transformer modules, the input underwent a convolutional layer and was augmented with  
24 the sinusoidal position embeddings to incorporate positional information. Finally, the Transformer decoder  
25 module further interpreted the hidden representation of the audio data and generated textual output through  
26 a language head <sup>8</sup>. We utilized the latest Whisper series model, the Whisper large-v3, with 1,550M param-  
27 eters, to specify the spoken language for improved speech recognition.

28 All the transcripts were cleaned and preprocessed to remove unnecessary information and ensure  
29 consistency. Initially, we automatically removed sentences with duplicated content. Additionally, sentences  
30 containing words or characters in other languages were cleaned to avoid transcription errors. Finally, all the  
31 podcast transcripts were carefully and manually reviewed to maintain content quality. Consequently, 2,836,  
32 327, and 34 sentences were filtered from English, Spanish, and French data, accounting for 0.16%, 0.14%,  
33 and 0.04% of the total content, respectively. This diverse and high-quality dataset ensured that MedPodGPT  
34 was well-equipped to handle a wide range of medical queries with high precision and contextual relevance.

35 **Model architecture** The Transformer model <sup>9</sup>, renowned for its multi-head self-attention mechanism,  
36 has become the backbone of many state-of-the-art AI models. Unlike traditional methods, the self-attention  
37 mechanism of the Transformer model captures long-range dependencies with efficient parallelization and  
38 scalability. Additionally, its deep feedforward neural networks enhance the model's capacity to learn com-  
39 plex patterns in data. Our proposed MedPodGPT leverages this advanced architecture and is designed for  
40 medical and educational purposes. Built upon state-of-the-art general large language models (LLMs) such

41 as Gemma <sup>10</sup>, LLaMA <sup>11</sup>, and Mistral <sup>12</sup>, MedPodGPT is pre-trained on a diverse corpus of textual data  
42 extracted from medical podcasts. By utilizing instruction-tuned variants of these LLMs, we aimed to im-  
43 prove instruction-following capabilities and conversational structure. To evaluate the effectiveness of our  
44 framework, we applied models of varying scales, ranging from 2 to 70 billion parameters.

45 Gemma is a series of lightweight open models developed by Google DeepMind. These are text-to-  
46 text auto-regressive language models, which have pre-trained versions as well as fine-tuned variants. These  
47 models were trained on the textual datasets on a context length of 8192 from a wide variety of sources. The  
48 primary sources include web documents, codes, and mathematical content. Several recent advancements  
49 have been made to improve the performance and training efficiency of the Transformer model. These in-  
50 clude multi-query attention <sup>13</sup>, rotary positional embeddings <sup>14</sup>, and GeGLU activations <sup>15</sup>. We utilized the  
51 Gemma models 2B and 7B to validate our framework across different model sizes. LLaMA is a family of  
52 advanced general-purpose LLMs released by Meta Research, with a publicly accessible 70B model for out-  
53 standing capability. These models are constructed using a decoder-only Transformer architecture as well as  
54 the grouped-query attention for improved efficiency <sup>16</sup>. Both model variants 8B and 70B were pretrained  
55 using a context length of 8192 on publicly available sources, with over 5% of the pretraining dataset con-  
56 sisting of non-English data covering over 30 languages. We encoded medical knowledge into the 8B and  
57 70B weights to enhance their understanding of medicine. The Mistral series has been open-sourced by the  
58 Mistral AI team for open and portable generative AI. The models employ the standard decoder-only archi-  
59 tecture with improved efficiency using grouped-query and sliding window attention, rolling buffer cache,  
60 and chunking. Furthermore, the initial generative Sparse Mixture of Experts (MoE) model was designed to  
61 balance computational load and model capability. In this work, we implemented our framework to the 7B  
62 and 7×8B MoE models to assess the MoE-based architecture.

63 Pre-training is a crucial step in the development of LLMs, during which the model learns from a  
64 vast corpus of text data in an auto-regressive manner. This phase generally leverages self-supervised learn-  
65 ing, employing methods like masked language modeling, *e.g.*, BERT <sup>17</sup>, or autoregressive modeling, *e.g.*,  
66 GPT <sup>18</sup>. The self-supervised learning framework allows the model to gain a broad understanding of knowl-  
67 edge, thereby improving its performance in subsequent tasks. In this work, we utilized an auto-regressive  
68 objective to perform continual pretraining through an iterative gradient solver. The above-mentioned LLMs  
69 have been pre-trained on trillions of tokens. Thus, one cost-effective and efficient way to encode domain-  
70 specific knowledge is through continuous pre-training and evolving the pre-trained models with expertise  
71 corpora, instead of retraining them from scratch. The podcast transcripts were represented by a sequence of  
72 tokens, *i.e.*,  $\mathbf{x} = \{x_1, x_2, \dots, x_N\}$ , where  $x_i$  is a subword token and  $N$  denotes the length of the sequence.  
73 We trained our podcast data on pre-trained models in an auto-regressive manner, optimizing the models by  
74 minimizing the negative log likelihood. The training objective is as follows,

$$\mathcal{L}_{\pi_{\theta}} = - \sum \log(\pi_{\theta}(x_i | \mathbf{x}_{<i})),$$

75 where  $\pi_{\theta}$  is the language model, parameterized by  $\theta$ .

76 **Experimental settings** To comprehensively analyze the capabilities of MedPodGPT, we employed a  
77 wide range of model sizes and conducted extensive experiments on multilingual medical knowledge. In  
78 current literature, benchmarks for multiple-choice question-answering (QA) were commonly utilized to  
79 evaluate the performance of large medical language models. Thus, in this work, we utilized the multilingual  
80 multiple-choice QA benchmarks to evaluate the model’s performance. In addition, we conducted experi-

81 ments and documented the performance of all the models that were used in this study on multilingual medical  
82 benchmarks. This potentially advances the field with an open-source and unified multilingual benchmarking  
83 library covering training, inference, answer extraction, performance evaluation, and real-world deployment.  
84 Furthermore, to guarantee scientific reproducible research, we implemented all our experiments with a set  
85 of unified hyperparameters. Thus, our work was out of the box without any specific hyperparameter tuning  
86 and further optimization for different models.

87 **Evaluation benchmarks** To evaluate the performance of MedPodGPT, we utilized a comprehensive set  
88 of medical benchmarks from the most spoken languages in the world, including English, Mandarin, French,  
89 Spanish, and Hindi. For intra-language experiments, we performed performance evaluations on datasets  
90 where the language aligned with the podcast content. Furthermore, for cross-language experiments, the  
91 model was evaluated on benchmarks in different languages compared to the podcasts. This evaluation was  
92 crucial for validating the effectiveness of the zero-shot multilingual transfer capability of medical LLMs.  
93 The detailed descriptions of multilingual benchmarks are as follows.

94 *Medical benchmarks in English* The benchmarks for medical natural language understanding in English have  
95 been significantly advanced over the past decade. In this study, we selected five well-known publicly acces-  
96 sible benchmarks, which include MedQA<sup>19</sup>, PubMedQA<sup>20</sup>, MedMCQA<sup>21</sup>, MedExpQA<sup>22</sup>, and MMLU  
97 clinical topics<sup>23</sup>. For the MMLU benchmark, we followed the Google PaLM work and chose six clinical  
98 subcategories, *i.e.*, anatomy, clinical knowledge, college biology, college medicine, medical genetics, and  
99 professional medicine<sup>24</sup>. These benchmarks cover a wide range of medical topics and question formats,  
100 providing a robust evaluation framework to assess the model’s capabilities.

101 *Medical benchmarks in Chinese* The benchmarking of medical and clinical knowledge in Chinese has be-  
102 come increasingly popular recently. A range of databases have been successively proposed to assess the  
103 performance of Chinese language models on medical data<sup>25</sup>. In this study, we adopted the popular MedQA-  
104 MCMLLE<sup>19</sup> and CMMU medical topics<sup>25</sup>. For the CMMLU benchmark, the medical and clinically related  
105 subsets were utilized, containing anatomy, clinical knowledge, medical school, genetics, nutrition, tradi-  
106 tional Chinese medicine, and virology<sup>26</sup>. These eight datasets provide comprehensive and in-depth Chinese  
107 medical contexts for evaluating the knowledge and reasoning capabilities of multilingual language models.

108 *Medical benchmarks in Spanish* The Spanish medical testbed encourages the NLP community to develop  
109 new approaches for understanding and reasoning medical and clinical knowledge in Spanish. The HEAD-  
110 QA benchmark was utilized in our research. It is a multiple-choice healthcare dataset obtained from ex-  
111 aminations in the Spanish healthcare system<sup>27</sup>. Additionally, we also employed the MedExpQA Spanish  
112 subset<sup>22</sup> and Spanish MMLU clinical topics<sup>26</sup>. The selected benchmarks cover various medical content, in-  
113 cluding medical, clinical, and healthcare knowledge, providing an adequate platform to evaluate the model’s  
114 performance in Spanish.

115 *Medical benchmarks in French* We primarily selected the popular FrenchMedMCQA dataset, which consists  
116 of 3, 105 questions taken from the French pharmacy diploma examinations<sup>28</sup>. Following Wang et al., we  
117 only performed performance evaluations on questions with a single answer<sup>26</sup>. As a result, the total number  
118 of questions in the testing set was 321. Furthermore, the MedExpQA French subset<sup>22</sup> and French MMLU  
119 clinical topics<sup>26</sup> were also included in this work. The databases mentioned above played a significant role  
120 in interpreting French medical knowledge and assessing the performance of models in French.

121 *Medical benchmarks in Hindi* To encode medical and clinical content in Hindi, we included the Hindi  
122 MMLU clinical topics<sup>26</sup> in our benchmarking. Thus, we can evaluate the model’s ability to understand  
123 medical language in Hindi and cover one of the most widely spoken languages in the world. It also sets the  
124 standards for evaluating multilingual LLMs in the medical and clinical field.

125 **Implementation details** We began transcribing podcast data using the OpenAI Whisper large-v3 model  
126 for an automatic speech recognition task. The chunk length was set to 30 seconds with a 5-second stride on  
127 both sides to improve the continuity and coherence of the transcriptions. The batch size was 96, and 384  
128 tokens were generated per chunk to parallelly process audio chunks.

129 We encoded medical knowledge and clinical practice across a wide range of model sizes, from 2B to  
130 70B. We have implemented publicly available language models, which include the 2B and 7B versions of  
131 the Gemma series, the most recent fine-tuned version (v0.3) of the Mistral 7B family, the instruction-tuned  
132 variant of the LLaMA 3 8B collections, the first open-sourced MoE model, which is the Mixtral 8×7B sparse  
133 MoE, and the instruction-tuned generative text LLaMA models in 70B. During model training, we utilized  
134 Brain float 16 data type with the AdamW optimizer to prevent overflow issues<sup>29</sup>, and the context window  
135 was set to 2,048<sup>26</sup>. We trained all models for 5 epochs with an initial learning rate of  $5 \times 10^{-6}$  with a 0.03  
136 warm-up ratio and a cosine schedule. The weight decay rate was 0.01, and the gradient was accumulated  
137 during each training step. Due to the computational limit, we have employed the 8-bit quantized AdamW  
138 optimizer and implemented the low-rank adaptation (LoRA) in the Mixtral 8×7B sparse MoE and LLaMA  
139 3 70B models. The rank and alpha were set to 16 and 32, respectively, and the dropout rate was 0.1. All the  
140 models were optimized based on the unified hyper-parameter settings without specific tuning for superior  
141 performance.

142 **Software and database infrastructure** We created a custom graphical user interface (GUI) and plat-  
143 form infrastructure to allow users to interact with MedPodGPT, providing public access to our model. Our  
144 goal was to deliver our model with a user-friendly and responsive conversational interface. For hardware, we  
145 utilized a custom-built method to deploy our LLMs at scale using entirely self-hosted and open-source tools  
146 without relying on software as a service (SaaS) or proprietary software. MedPodGPT’s hardware included  
147 4 NVIDIA RTX 3080 Ti GPUs and 3 production servers, each with 4 CPU cores and 8GB RAM. This setup  
148 is modest, supporting only hundreds of individual users per day, but the architecture can be quickly scaled  
149 to match the load.

150 We employed a microservice architecture using Kubernetes as a container orchestration tool. Kuber-  
151 netes manages clusters of nodes hosting microservices wrapped inside Docker containers. It facilitates the  
152 creation of highly available distributed systems that automatically scale to meet needs and ensure secure  
153 inter-cluster communication, IP address allocation, load balancing, and reverse proxy services. We utilized  
154 ReactJS and NextJS for the front end. ReactJS furnishes a collection of APIs and libraries to construct  
155 reusable web components, while NextJS provides scaffolding for ReactJS applications, encompassing an  
156 HTTP server, server-side rendering, and a “back end for a front end” design pattern. For LLM deployment,  
157 we employed the vLLM library, which offers a fast and portable inference server that batches inference tasks  
158 efficiently<sup>30</sup>. It requires a minimum of NVIDIA 11 and a 7.5 compute-capable NVIDIA GPU, supporting  
159 several GPUs on different host machines simultaneously.

160 Authentication and user management are crucial components of our architecture. In order to distribute  
161 resources equitably among potential researchers, we have implemented OAuth 2.0 compliant authorization  
162 and user management in addition to a per-token rate limiting system based on user scopes and total system  
163 load. MedPodGPT implements features which users familiar with widely-used chatting services expect, such  
164 as multiturn conversations and the ability to open many conversations. Furthermore, MedPodGPT utilized  
165 Apache Cassandra, a distributed NoSQL database designed for high availability and query optimization.  
166 The backend API router, which was built with Flask, stores new chats and conversations in Cassandra and  
167 sends text inference requests to a queue. For queuing and message processing, we utilized RabbitMQ and  
168 Redis, which are a message broker and key-value databases, respectively. Each fine-tuned model can be  
169 assigned its own queue in RabbitMQ to receive messages. When a user requests a message, the conversation  
170 is processed by a vLLM gateway module. This module asynchronously generates text completions from  
171 vLLM, acknowledges the message to the broker, and stores the message in Redis. The API then serves the  
172 completed text inference via another text completion endpoint, referenced by a unique text completion ID.

173 **Data and model availability** A multilingual LLMs benchmarking library along with the source codes  
174 are made available at <https://github.com/vkola-lab/MedPodGPT>.



## 1 Results

2 We conducted comprehensive experiments to assess MedPodGPT’s performance on various multilingual  
3 medical QA benchmark datasets. Our results demonstrate that incorporating medical audio podcast data  
4 enhances the model’s ability to understand and generate medically relevant information. In addition, the  
5 models across a wide range of scales outperformed their respective baselines in both in-domain benchmarks  
6 and zero-shot domain generalization across multilingual medical datasets.

7 **Performance on in-domain benchmarks** The evaluation of MedPodGPT across diverse medical  
8 question-answering benchmarks demonstrated enhanced model efficacy following pre-training with mul-  
9 tilingual medical podcast datasets (Table 2). Specifically, on the MedExpQA benchmark, MedPodGPT  
10 achieved significant performance gains, *i.e.*, a 10.80% increase with the Gemma 7B model, 8.40% with the  
11 Mixtral 8×7B MoE, and 8.20% with the Gemma 2B model. In MedMCQA, improvements were notable,  
12 with the Gemma 7B model increasing by 4.20% and the Mixtral MoE by 3.34%. Additionally, the Gemma  
13 7B model showed enhancements of 6.30% and the 2B model 3.69% on the MedQA database. Evaluation on  
14 French benchmarks revealed substantial improvements, with MedPodGPT achieving 10.67% and 9.81% en-  
15 hancements on FrenchMedMCQA with Gemma 7B and LLaMA 3 70B models, respectively. Moreover, on  
16 French MedExpQA, the Gemma 7B model outperformed the baseline by a remarkable 12.80%. In Spanish  
17 benchmarks, the Gemma 7B model of MedPodGPT demonstrated improvements of 6.26% on HeadQA and  
18 5.60% on MedExpQA. Lastly, across multilingual MMLU benchmarks, MedPodGPT consistently surpassed  
19 baseline models, achieving improvements up to 13.50% and averaging 7.23%. Overall, MedPodGPT showed  
20 a cumulative 2.31% enhancement across in-domain benchmarks, highlighting the advantage of leveraging  
21 open-source multilingual podcast datasets to enhance model efficacy.

22 As shown in Table S1, we further evaluated MedPodGPT across various English medical QA bench-  
23 marks after pre-training with English medical podcast data. On the MedExpQA dataset, MedPodGPT demon-  
24 strated a notable increase of 6.60% in the Gemma 2B model, 7.80% in the Gemma 7B model, and 7.00%  
25 in the Mixtral MoE model. Similarly, on the MedMCQA dataset, there were improvements of 3.89% in  
26 the Gemma 7B model and 2.59% in the Mistral 7B model. For the MedQA dataset, the performance en-  
27 hancements included a 6.87% increase in the Gemma 7B model and a 3.85% increase in the Gemma 2B  
28 model. In the PubMedQA dataset, the Gemma 2B model saw an improvement of 9.40%. In the MMLU  
29 anatomy dataset, the Mixtral MoE and Gemma 7B improved by 2.97% and 2.59%, respectively. Addition-  
30 ally, for the college biology dataset, there were increases of 4.34% in the Gemma 2B model, 8.16% in the  
31 Gemma 7B model, and 4.68% in the Mistral 7B model. For the college medicine dataset, the Gemma 7B and  
32 Mixtral MoE models showed increases of 4.19% and 4.05%, respectively. Lastly, in the clinical knowledge  
33 dataset, the Gemma 7B model showed a 7.07% improvement, while the Mixtral MoE model had an increase  
34 of 7.84%. These results underscore the effectiveness of integrating podcast data into the training process,  
35 resulting in performance gains across most instances, with an average improvement of 2.16%.

36 **Zero-shot cross-lingual performance** In Table 3, we validated MedPodGPT’s zero-shot cross-lingual  
37 performance using multilingual benchmarks. These benchmarks encompass a wide array of medical sub-  
38 jects, including traditional Chinese medicine, medical nutrition, and Hindi MMLU. The Gemma 7B model  
39 of MedPodGPT showcased a significant 5.47% improvement on the MedQA-MCMLE benchmark. More-  
40 over, it exhibited superior performance on CMMLU benchmarks, achieving average increases up to 5.19%.

41 Remarkably, the Gemma 7B model achieved significant performance improvements of 8.65%, 8.29%, and  
42 6.59% on CMMLU benchmarks focusing on clinical knowledge, anatomy, and virology topics. Lastly,  
43 across Hindi benchmarks, particularly clinical knowledge, medical genetics, and professional medicine,  
44 MedPodGPT demonstrated notable performance gains, with improvements reaching up to 10.94% across  
45 various models. Overall, MedPodGPT demonstrated its superiority by enhancing its zero-shot multilingual  
46 transfer capability, achieving an average improvement of 2.58% across models and effectively generalizing  
47 to diverse linguistic contexts.

48 In addition, MedPodGPT was trained on English podcast data, and its zero-shot transfer capability  
49 was assessed as well in Table S2. These benchmarks encompass a wide range of medical subjects, including  
50 traditional Chinese medicine, French pharmaceutical examinations, and specialized assessments in the Span-  
51 ish healthcare system. MedPodGPT showed improved performance on multilingual MMLU and CMMLU  
52 benchmarks. In Mandarin benchmarks, such as MedQA-MCMLE and clinical knowledge, MedPodGPT out-  
53 performed the baseline models, showing an average improvement of 1.87%. It also achieved enhancements  
54 of up to 7.28% on Mandarin benchmarks. Second, for the French benchmarks, including FrenchMedMCQA  
55 and MedExpQA, MedPodGPT demonstrated notable performance gains, with improvements ranging from  
56 1.72% to 3.87% across different categories. Lastly, in the Hindi and Spanish benchmarks, the model also  
57 exhibited enhanced performance, particularly in categories such as anatomy and clinical knowledge, where  
58 it showed increases of up to 11.67%. Overall, MedPodGPT exhibited a 2.28% enhancement in zero-shot  
59 multilingual transfer, further propelling AI advancements in medicine.

## 1 Discussion

2 We present MedPodGPT, a large language model that leverages the rich and diverse linguistic content of  
3 medical podcasts, capturing a wide array of medical terminologies and conversational contexts. Extensive  
4 pre-training on podcast data has endowed MedPodGPT with the capability to generate relevant medical  
5 information. When benchmarked against existing datasets such as MedQA, PubMedQA, MedMCQA, and  
6 various MMLU categories, MedPodGPT demonstrated superior performance, particularly in areas requiring  
7 detailed medical knowledge and contextual understanding. These results highlight its potential to serve as a  
8 valuable tool for medical education and research.

9 Our results indicate that our audio-augmented LLM framework improves the accuracy and relevance  
10 of medical information generated by the model. This enhancement is particularly evident when compared to  
11 a series of baseline models, such as Google Gemma, Meta LLaMA, and Mistral models, where MedPodGPT  
12 consistently outperformed these models across multiple benchmarks. This demonstrates that incorporating  
13 audio data provides a richer understanding of medical conversations, which is crucial for accurate medical  
14 language processing.

15 Our study has a few limitations. First, we focused on publicly available medical podcasts based on  
16 content feasibility and availability. While we incorporated content from popular medical podcasts, there are  
17 certainly more medically relevant contexts available, such as textbooks and even video tutorials. Extend-  
18 ing the language medium beyond English, we downloaded multilingual medical podcast data, specifically  
19 Spanish and French. We sought to include podcasts in Hindi and Mandarin, but we found relevant content to  
20 be limited. Despite these constraints, our model successfully learned from the multilingual podcast content,  
21 performing well on respective language benchmarks and even showing zero-shot performance on Hindi and  
22 Mandarin benchmarks. In the future, we aim to acquire richer and more relevant podcast data in numerous  
23 languages to further enhance model training and performance. Future work on MedPodGPT should also  
24 include a comprehensive ethical evaluation to ensure the model consistently adheres to high standards in  
25 diverse settings. Also, we observed that pre-training using podcast data did not improve performance on a  
26 few benchmarks. This finding can be attributed to the nature and structure of podcasts, which contrasts with  
27 the demands of these benchmarks. Podcast data, while rich in narrative and contextual content, lacks the  
28 precision, structure, and specific terminologies found in traditional medical texts and scientific literature.  
29 The informal and conversational style of podcasts may not align well with the formal, structured, and detail-  
30 oriented requirements of benchmarks such as PubMedQA, clinical knowledge, and professional medicine.  
31 To address this limitation and enhance performance, it is crucial to complement podcast training data with  
32 more structured and detailed medical texts, ensuring a balanced and comprehensive training dataset.

33 The findings from this study indicate that MedPodGPT represents an important advancement in the  
34 application of language models for medical applications. Its ability to process and generate medically rel-  
35 evant text holds promise for enhancing medical education and research. However, the deployment of such  
36 advanced models must be accompanied by rigorous considerations, particularly concerning patient confiden-  
37 tiality and data integrity. By continuing to advance the intersection of AI and medicine, we can ultimately  
38 improve the accessibility and quality of medical education and research, ensuring that such technologies  
39 benefit trainees and researchers alike. MedPodGPT highlights the value of integrating podcast data to en-  
40 hance language models, which can be extended to applications beyond health and medicine by incorporating  
41 diverse audio podcasts.

## 1 **Acknowledgements**

2 This project was supported by grants from the Karen Toffler Charitable Trust (V.B.K.), the National Institute  
3 on Aging's Artificial Intelligence and Technology Collaboratories (P30-AG073014, V.B.K.), the American  
4 Heart Association (20SFRN35460031, V.B.K. & R.A.), Gates Ventures (R.A. & V.B.K.), and the National  
5 Institutes of Health (R01-HL159620 [V.B.K.], R21-CA253498 [V.B.K.], R43-DK134273 [V.B.K.], RF1-  
6 AG062109 [R.A. & V.B.K.], and U19-AG068753 [R.A.]).

## 7 **Author contributions**

8 S.J., S.G., and E.S. contributed equally to this work. S.J., S.G., L.A.C., P.F., V.H.J., M.V.L., and D.V. curated  
9 and processed the data. S.J. and S.G. performed model training. E.S. and W.M.W. worked on software devel-  
10 opment. S.J., S.G., L.A.C., P.F., V.H.J., M.V.L., E.S., D.V. and W.M.W. generated the results. R.A. provided  
11 clinical context. V.B.K. wrote the manuscript. All authors reviewed, edited, and approved the manuscript.  
12 V.B.K. conceived, designed, and directed the study.

## 13 **Ethics declarations**

14 V.B.K. is on the scientific advisory board for Altoida Inc. and serves as a consultant to AstraZeneca. R.A. is a  
15 scientific advisor to Signant Health and NovoNordisk. The remaining authors declare no competing interests.

## 1 References

- 2 1. Thirunavukarasu, A. J. *et al.* Large language models in medicine. *Nature Medicine* **29**, 1930–1940  
3 (2023).
- 4 2. Liu, G. *et al.* Medical-VLBERT: Medical visual language BERT for COVID-19 CT report generation  
5 with alternate learning. *IEEE Transactions on Neural Networks and Learning Systems* **32**, 3786–3797  
6 (2021).
- 7 3. Zhang, X., Wu, C., Zhang, Y., Xie, W. & Wang, Y. Knowledge-enhanced visual-language pre-training  
8 on chest radiology images. *Nature Communications* **14**, 4542 (2023).
- 9 4. Huang, Z., Bianchi, F., Yuksekogonul, M., Montine, T. & Zou, J. A visual-language foundation model  
10 for pathology image analysis using medical twitter. *Nature Medicine* **29**, 2307–2316 (2023).
- 11 5. Lu, M. *et al.* A visual-language foundation model for computational pathology. *Nature Medicine* **30**,  
12 863–874 (2024).
- 13 6. Huemann, Z., Tie, X., Hu, J. & Bradshaw, T. ConTEXTual Net: A multimodal vision-language model  
14 for segmentation of pneumothorax. *Journal of Imaging Informatics in Medicine* (2024).
- 15 7. Radford, A. *et al.* Robust speech recognition via large-scale weak supervision. In *International Con-*  
16 *ference on Machine Learning (ICML)*, 28492–28518 (PMLR, 2023).
- 17 8. Press, O. & Wolf, L. Using the output embedding to improve language models. In Lapata, M., Blunsom,  
18 P. & Koller, A. (eds.) *Proceedings of the 15th Conference of the European Chapter of the Association*  
19 *for Computational Linguistics: Volume 2, Short Papers*, 157–163 (Association for Computational Lin-  
20 *guistics, Valencia, Spain, 2017).*
- 21 9. Vaswani, A. *et al.* Attention is all you need. vol. 30 (2017).
- 22 10. Team, G. *et al.* Gemma: Open models based on Gemini research and technology (2024).
- 23 11. Touvron, H. *et al.* LLaMA: Open and efficient foundation language models. *arXiv preprint*  
24 *arXiv:2302.13971* (2023).
- 25 12. Jiang, A. Q. *et al.* Mistral 7b (2023).
- 26 13. Shazeer, N. Fast Transformer decoding: One write-head is all you need (2019).
- 27 14. Su, J. *et al.* RoFormer: Enhanced transformer with rotary position embedding. *Neurocomputing* **568**,  
28 127063 (2024).
- 29 15. Shazeer, N. GLU variants improve Transformer (2020).
- 30 16. Ainslie, J. *et al.* GQA: Training generalized multi-query transformer models from multi-head check-  
31 points. In *Proceedings of the 2023 Conference on Empirical Methods in Natural Language Processing*,  
32 4895–4901 (2023).
- 33 17. Devlin, J., Chang, M.-W., Lee, K. & Toutanova, K. BERT: Pre-training of deep bidirectional Trans-  
34 formers for language understanding. In *Proceedings of the 2019 Conference of the North American*  
35 *Chapter of the Association for Computational Linguistics: Human Language Technologies, Volume 1*  
36 *(Long and Short Papers)*, 4171–4186 (2019).

- 37 18. Brown, T. *et al.* Language models are few-shot learners. *Advances in Neural Information Processing*  
38 *Systems (NeurIPS)* **33**, 1877–1901 (2020).
- 39 19. Jin, D. *et al.* What disease does this patient have? A large-scale open domain question answering dataset  
40 from medical exams. *Applied Sciences* **11**, 6421 (2021).
- 41 20. Jin, Q., Dhingra, B., Liu, Z., Cohen, W. & Lu, X. PubMedQA: A dataset for biomedical research ques-  
42 tion answering. In Inui, K., Jiang, J., Ng, V. & Wan, X. (eds.) *Proceedings of the 2019 Conference on*  
43 *Empirical Methods in Natural Language Processing and the 9th International Joint Conference on Nat-*  
44 *ural Language Processing (EMNLP-IJCNLP)*, 2567–2577 (Association for Computational Linguistics,  
45 Hong Kong, China, 2019).
- 46 21. Pal, A., Umapathi, L. K. & Sankarasubbu, M. MedMCQA: A large-scale multi-subject multi-choice  
47 dataset for medical domain question answering. In Flores, G., Chen, G. H., Pollard, T., Ho, J. C. &  
48 Naumann, T. (eds.) *Proceedings of the Conference on Health, Inference, and Learning*, vol. 174 of  
49 *Proceedings of Machine Learning Research*, 248–260 (PMLR, 2022).
- 50 22. Alonso, I., Oronoz, M. & Agerri, R. MedExpQA: Multilingual benchmarking of large language models  
51 for medical question answering. *arXiv preprint arXiv:2404.05590* (2024).
- 52 23. Hendrycks, D. *et al.* Measuring massive multitask language understanding. In *International Conference*  
53 *on Learning Representations (ICLR)* (2021).
- 54 24. Singhal, K. *et al.* Large language models encode clinical knowledge. *Nature* **620**, 172–180 (2023).
- 55 25. Li, H. *et al.* CMMLU: Measuring massive multitask language understanding in Chinese. *arXiv preprint*  
56 *arXiv:2306.09212* (2023).
- 57 26. Wang, X. *et al.* Apollo: An lightweight multilingual medical LLM towards democratizing medical AI  
58 to 6b people. *arXiv preprint arXiv:2403.03640* (2024).
- 59 27. Vilares, D. & Gómez-Rodríguez, C. HEAD-QA: A healthcare dataset for complex reasoning. In Ko-  
60 ronen, A., Traum, D. & Màrquez, L. (eds.) *Proceedings of the 57th Annual Meeting of the Association*  
61 *for Computational Linguistics*, 960–966 (Association for Computational Linguistics, Florence, Italy,  
62 2019).
- 63 28. Labrak, Y. *et al.* FrenchMedMCQA: A French multiple-choice question answering dataset for medical  
64 domain. In Lavelli, A. *et al.* (eds.) *Proceedings of the 13th International Workshop on Health Text*  
65 *Mining and Information Analysis (LOUHI)*, 41–46 (Association for Computational Linguistics, Abu  
66 Dhabi, United Arab Emirates (Hybrid), 2022).
- 67 29. Loshchilov, I. & Hutter, F. Decoupled weight decay regularization. In *International Conference on*  
68 *Learning Representations (ICLR)* (2019).
- 69 30. Kwon, W. *et al.* Efficient memory management for large language model serving with pagedattention.  
70 In *Proceedings of the 29th Symposium on Operating Systems Principles*, 611–626 (2023).

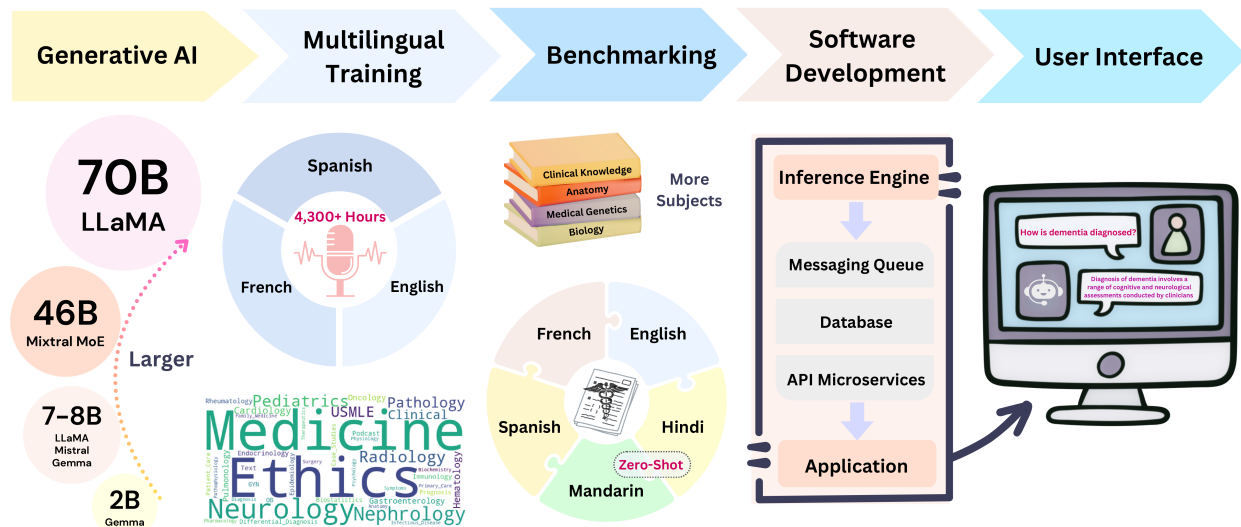

Figure 1: **MedPodGPT framework.** This figure illustrates the workflow and components involved in developing MedPodGPT, a multilingual audio-augmented large language model designed for medical research and education. The process began by utilizing publicly available generative AI auto-regressive language models across various scales, including the Gemma series, LLaMA collections, and the Mistral family. These models underwent multilingual pre-training on podcast content from journals, exam preparation materials, and clinical practice in English, Spanish, and French, totaling over 4,300 hours of context covering diverse medical topics indicated in the word cloud. Following pre-training, the models were evaluated using multilingual medical question-answering benchmarks, spanning various subjects, including clinical knowledge, anatomy, medical genetics, and biology, in the most commonly spoken languages worldwide. Additional benchmarks in Hindi and Mandarin were also employed to assess MedPodGPT’s zero-shot transfer capability. The next phase involved software development, encompassing the inference engine for model deployment, messaging queue, database, API microservices, and responsive human-machine interface. This infrastructure enables users to engage through a chat interface supported by an adaptive chatbot, facilitating multi-turn conversations.

| Journal Podcasts                                            |          |          |                  |                                          |                       |                                          |
|-------------------------------------------------------------|----------|----------|------------------|------------------------------------------|-----------------------|------------------------------------------|
| Podcast                                                     | Language | Episodes | Audio Time (min) | Mean Length Episode $\pm\sigma$ (min)    | Number of Text Tokens | Mean Text Tokens per Episode $\pm\sigma$ |
| NEJM                                                        | English  | 1974     | 39256.0          | 19.89 $\pm$ 9.74                         | 4,760,783             | 1928.22 $\pm$ 14.87                      |
| JAMA                                                        | English  | 2235     | 32163.0          | 14.39 $\pm$ 8.66                         | 3,454,191             | 1928.64 $\pm$ 15.54                      |
| The Lancet                                                  | English  | 2029     | 28279.0          | 13.94 $\pm$ 7.62                         | 3,300,982             | 1925.89 $\pm$ 20.88                      |
| The BMJ                                                     | English  | 300      | 13264.2          | 44.21 $\pm$ 10.35                        | 2,235,458             | 1897.67 $\pm$ 75.07                      |
| Annals Latest Highlights                                    | English  | 396      | 6427.0           | 16.23 $\pm$ 8.09                         | 803,958               | 1927.96 $\pm$ 14.60                      |
| Annals On Call                                              | English  | 142      | 3440.0           | 24.22 $\pm$ 3.65                         | 522,547               | 1928.22 $\pm$ 15.64                      |
| Pediatrics on Call                                          | English  | 98       | 3299.0           | 33.66 $\pm$ 6.09                         | 565,781               | 1930.99 $\pm$ 15.00                      |
| Procedure Ready: Ob/Gyn                                     | English  | 20       | 383.7            | 19.19 $\pm$ 5.00                         | 63,667                | 1929.30 $\pm$ 13.41                      |
| Revista Médica AFP Podcast                                  | Spanish  | 40       | 1055.0           | 26.38 $\pm$ 3.70                         | 190,518               | 1924.42 $\pm$ 16.34                      |
| Test Preparation Podcasts                                   |          |          |                  |                                          |                       |                                          |
| Podcast                                                     | Language | Episodes | Audio Time (min) | Mean Length of Episode $\pm\sigma$ (min) | Number of Text Tokens | Mean Text Tokens per Episode $\pm\sigma$ |
| Divine Intervention Podcasts                                | English  | 480      | 18363.8          | 38.26 $\pm$ 24.07                        | 2,269,153             | 1931.19 $\pm$ 13.53                      |
| The Radiology Review Podcast                                | English  | 127      | 2517.7           | 19.82 $\pm$ 10.10                        | 292,949               | 1927.29 $\pm$ 26.81                      |
| Crush Step 1: The Ultimate USMLE Step 1 Review              | English  | 49       | 2176.2           | 44.41 $\pm$ 15.31                        | 328,194               | 1930.55 $\pm$ 13.03                      |
| The USMLE Guys Podcast                                      | English  | 31       | 1464.3           | 47.24 $\pm$ 43.47                        | 156,923               | 1937.32 $\pm$ 6.12                       |
| Harrison's PodClass: Internal Medicine Cases and Board Prep | Spanish  | 95       | 905.2            | 9.53 $\pm$ 2.24                          | 101,574               | 1916.49 $\pm$ 22.77                      |
| El Interno Desvelado                                        | Spanish  | 4        | 99.13            | 24.78 $\pm$ 11.91                        | 17,121                | 1902.33 $\pm$ 25.54                      |
| Curso MIR Asturias                                          | Spanish  | 3        | 17.7             | 5.89 $\pm$ 4.53                          | 3,872                 | 1936.00 $\pm$ 9.00                       |
| Clinical Podcasts                                           |          |          |                  |                                          |                       |                                          |
| Podcast                                                     | Language | Episodes | Audio Time (min) | Mean Length of Episode $\pm\sigma$ (min) | Number of Text Tokens | Mean Text Tokens per Episode $\pm\sigma$ |
| The Curbsiders Internal Medicine Podcast                    | English  | 485      | 28749.2          | 59.39 $\pm$ 16.08                        | 5,772,083             | 1929.82 $\pm$ 17.06                      |
| This Podcast Will Kill You                                  | English  | 168      | 18363.8          | 38.26 $\pm$ 24.07                        | 2,269,153             | 1931.19 $\pm$ 13.53                      |
| The Clinical Problem Solvers                                | English  | 315      | 13500.1          | 42.86 $\pm$ 14.51                        | 2,493,777             | 1927.18 $\pm$ 23.32                      |
| PsychEd: educational psychiatry podcast                     | English  | 62       | 3556.3           | 57.36 $\pm$ 17.52                        | 607,237               | 1927.74 $\pm$ 16.36                      |
| Run the List                                                | English  | 97       | 1973.0           | 20.34 $\pm$ 6.44                         | 352,977               | 1928.84 $\pm$ 15.17                      |
| Goljan Pathology Lectures                                   | English  | 37       | 1886.0           | 50.97 $\pm$ 4.58                         | 412,086               | 1934.68 $\pm$ 13.45                      |
| Core IM: 5 Pearls                                           | English  | 54       | 1847.1           | 34.21 $\pm$ 10.19                        | 361,213               | 1931.62 $\pm$ 10.16                      |
| Neurology Clinical Pearls                                   | English  | 27       | 333.2            | 12.34 $\pm$ 3.19                         | 42,494                | 1931.54 $\pm$ 10.78                      |
| Tutorías Medicina Interna                                   | Spanish  | 570      | 19834.9          | 34.80 $\pm$ 25.01                        | 4,311,263             | 1898.39 $\pm$ 64.31                      |
| Leucocitos isotópicos                                       | Spanish  | 68       | 2537.8           | 37.32 $\pm$ 9.55                         | 481,676               | 1797.29 $\pm$ 154.42                     |
| Medicina Con Cabeza                                         | Spanish  | 246      | 2457.8           | 9.99 $\pm$ 3.44                          | 462,383               | 1902.81 $\pm$ 57.55                      |
| Medicina de impacto                                         | Spanish  | 57       | 2406.5           | 42.22 $\pm$ 9.13                         | 492,363               | 1915.81 $\pm$ 29.28                      |
| Ronda, El Podcast de Medicina Interna                       | Spanish  | 20       | 1084.4           | 54.22 $\pm$ 25.01                        | 206,218               | 1891.91 $\pm$ 71.90                      |
| Medicina De Bolsillo   Hablando de Medicina                 | Spanish  | 45       | 958.3            | 21.30 $\pm$ 10.79                        | 186,268               | 1844.24 $\pm$ 124.82                     |
| La Tertulia de Cajal                                        | Spanish  | 27       | 876.3            | 32.46 $\pm$ 18.28                        | 186,001               | 1897.97 $\pm$ 57.71                      |
| PedCast: Dos Pediatras y un Podcast                         | Spanish  | 14       | 458.5            | 32.75 $\pm$ 10.62                        | 89,127                | 1896.32 $\pm$ 58.05                      |
| Neurobiologie et Immunite                                   | French   | 21       | 1882.8           | 89.66 $\pm$ 14.77                        | 383,189               | 1896.97 $\pm$ 40.12                      |
| Incubateur Néonate                                          | French   | 25       | 1579.3           | 63.17 $\pm$ 21.28                        | 391,475               | 1918.99 $\pm$ 24.15                      |
| Guideline.care                                              | French   | 68       | 1369.1           | 20.13 $\pm$ 6.30                         | 293,301               | 1917.0 $\pm$ 29.29                       |
| La Minute Rhumato                                           | French   | 119      | 921.0            | 7.74 $\pm$ 2.19                          | 132,354               | 1918.17 $\pm$ 23.59                      |
| Oncologie cellulaire et moléculaire - Hugues de Thé         | French   | 11       | 852.9            | 77.53 $\pm$ 19.81                        | 186,693               | 1905.03 $\pm$ 44.42                      |
| Le podcast des Conférenciers (UFR3S) by Université de Lille | French   | 65       | 768.4            | 11.82 $\pm$ 19.58                        | 86,105                | 1913.44 $\pm$ 42.78                      |
| Super Docteur                                               | French   | 47       | 676.3            | 14.39 $\pm$ 6.50                         | 139,824               | 1915.40 $\pm$ 33.26                      |
| Médecine, Sciences et Recherche clinique                    | French   | 24       | 332.2            | 13.84 $\pm$ 4.58                         | 63,314                | 1918.61 $\pm$ 26.60                      |
| NéphroDio                                                   | French   | 40       | 318.6            | 7.96 $\pm$ 2.58                          | 55,716                | 1921.24 $\pm$ 19.59                      |
| La Minute Néonate                                           | French   | 37       | 307.6            | 8.31 $\pm$ 1.93                          | 57,435                | 1914.50 $\pm$ 31.58                      |
| Le Med G Eclairé                                            | French   | 11       | 249.2            | 22.66 $\pm$ 16.76                        | 51,988                | 1925.48 $\pm$ 12.57                      |
| La Minute du Pancréas                                       | French   | 22       | 209.4            | 9.52 $\pm$ 2.34                          | 38,376                | 1918.80 $\pm$ 23.34                      |
| L'essentiel des principales pathologiesaà                   | French   | 14       | 151.3            | 10.81 $\pm$ 13.10                        | 23,098                | 1924.83 $\pm$ 11.25                      |
| AR-Pod le Podcast de lanesthésie-réanimation                | French   | 12       | 139.0            | 11.59 $\pm$ 4.52                         | 22,998                | 1916.50 $\pm$ 26.48                      |

**Table 1: Podcasts used for model development.** This table presents an overview of 46 journal, test preparation, and clinical podcasts used for the continual pre-training of MedPodGPT. It includes information on podcast names, languages, number of episodes, total audio time, mean length of episodes with standard deviation, number of text tokens, and mean text tokens per episode with standard deviation. For journal podcasts, NEJM, JAMA, The Lancet, and the BMJ have extensive episode counts with significant audio durations and token counts, showcasing their depth and breadth in medical discussions. Test preparation podcasts like “Crush Step 1” and “Divine Intervention” highlight detailed USMLE preparation with varying episode lengths and comprehensive content coverage. Clinical podcasts such as “The Clinical Problem Solvers” and “The Curbsiders Internal Medicine Podcast” emphasize educational content for medical professionals, with substantial episode counts and detailed discussions. The data from these podcasts, transcribed using OpenAI Whisper, demonstrates the diverse and robust dataset used for enhancing MedPodGPT’s medical knowledge and comprehension.



| Language       | Benchmark Datasets    | Model        |              |              |              |              |              |              |              |              |              |              |              |
|----------------|-----------------------|--------------|--------------|--------------|--------------|--------------|--------------|--------------|--------------|--------------|--------------|--------------|--------------|
|                |                       | Gemma 2B     |              | Gemma 7B     |              | Mistral 7B   |              | LLaMA 3 8B   |              | Mixtral MoE  |              | LLaMA 3 70B  |              |
|                |                       | Baseline     | <i>Ours</i>  | Baseline     | <i>Ours</i>  | Baseline     | <i>Ours</i>  | Baseline     | <i>Ours</i>  | Baseline     | <i>Ours</i>  | Baseline     | <i>Ours</i>  |
| English        | MedExpQA              | 15.20        | <b>23.40</b> | 34.40        | <b>45.20</b> | <b>47.20</b> | 46.20        | 57.60        | <b>61.40</b> | 52.80        | <b>61.20</b> | <b>78.40</b> | 77.60        |
|                | MedMCQA               | 34.81        | <b>35.24</b> | 40.66        | <b>44.86</b> | 42.65        | <b>45.50</b> | 58.64        | <b>58.82</b> | 50.20        | <b>53.54</b> | <b>71.12</b> | 70.58        |
|                | MedQA                 | 29.69        | <b>33.38</b> | 38.26        | <b>44.56</b> | 46.27        | <b>47.80</b> | <b>61.12</b> | 59.21        | <b>54.05</b> | 53.22        | <b>77.85</b> | 77.51        |
|                | PubMedQA              | 47.80        | <b>55.50</b> | <b>63.40</b> | 55.30        | <b>51.60</b> | 41.75        | <b>59.40</b> | 49.20        | <b>42.80</b> | 32.20        | 73.00        | <b>75.75</b> |
|                | Anatomy               | <b>43.70</b> | 42.04        | 49.63        | <b>52.96</b> | 56.30        | <b>56.67</b> | 68.89        | <b>69.82</b> | 64.44        | <b>68.15</b> | 77.04        | <b>77.78</b> |
|                | Clinical Knowledge    | <b>41.51</b> | 38.78        | 55.47        | <b>62.17</b> | 61.89        | <b>62.26</b> | 72.08        | <b>73.68</b> | 67.92        | <b>74.90</b> | 82.26        | <b>83.40</b> |
|                | College Biology       | 44.44        | <b>47.05</b> | 61.11        | <b>68.06</b> | 61.81        | <b>64.93</b> | 74.31        | <b>77.43</b> | 72.92        | <b>77.95</b> | 91.67        | <b>92.36</b> |
|                | College Medicine      | 36.99        | <b>37.14</b> | 50.29        | <b>55.06</b> | 57.80        | <b>59.97</b> | 67.05        | <b>68.06</b> | 63.58        | <b>69.07</b> | <b>78.61</b> | 78.18        |
|                | Medical Genetics      | 43.00        | <b>44.75</b> | 54.00        | <b>66.00</b> | 64.00        | <b>65.50</b> | <b>80.00</b> | 77.25        | 70.00        | <b>78.00</b> | 91.00        | <b>91.00</b> |
|                | Professional Medicine | 29.78        | <b>34.10</b> | 50.37        | <b>60.02</b> | 56.99        | <b>63.33</b> | <b>76.84</b> | 75.64        | 72.06        | <b>73.07</b> | <b>90.44</b> | 90.26        |
| <b>Average</b> | 36.69                 | <b>39.14</b> | 49.76        | <b>55.42</b> | 54.65        | <b>55.39</b> | <b>67.59</b> | 67.05        | 61.08        | <b>64.13</b> | 81.14        | <b>81.22</b> |              |
| French         | FrenchMedMCQA         | <b>29.91</b> | 28.43        | 29.60        | <b>40.27</b> | <b>45.48</b> | 44.32        | 41.74        | <b>44.63</b> | 55.14        | <b>58.02</b> | 63.24        | <b>73.05</b> |
|                | MedExpQA              | 19.20        | <b>20.60</b> | 26.40        | <b>39.20</b> | 40.80        | <b>41.20</b> | <b>48.00</b> | 43.60        | 50.40        | <b>56.00</b> | <b>76.80</b> | 74.00        |
|                | Anatomy               | <b>35.56</b> | 35.18        | 48.15        | <b>49.63</b> | 33.33        | <b>39.45</b> | 45.19        | <b>47.41</b> | 55.56        | <b>59.63</b> | 67.41        | <b>68.52</b> |
|                | Clinical Knowledge    | 32.45        | <b>36.51</b> | 50.94        | <b>57.92</b> | <b>55.47</b> | 53.02        | <b>61.89</b> | 61.13        | 65.66        | <b>71.51</b> | 78.87        | <b>80.56</b> |
|                | College Biology       | 33.33        | <b>38.02</b> | 46.53        | <b>52.78</b> | <b>53.47</b> | 49.65        | 57.64        | <b>62.50</b> | 67.36        | <b>72.92</b> | 86.81        | <b>87.67</b> |
|                | College Medicine      | 32.95        | <b>35.84</b> | 43.93        | <b>47.98</b> | <b>51.45</b> | 48.56        | 57.80        | <b>59.40</b> | 57.80        | <b>63.44</b> | 69.94        | <b>74.71</b> |
|                | Medical Genetics      | 35.00        | <b>40.00</b> | 50.00        | <b>57.25</b> | 47.00        | <b>59.00</b> | 66.00        | <b>67.00</b> | 71.00        | <b>72.00</b> | <b>90.00</b> | 89.50        |
|                | Professional Medicine | 24.26        | <b>28.95</b> | 33.09        | <b>42.00</b> | 43.38        | <b>43.84</b> | 51.47        | <b>55.51</b> | 59.56        | <b>64.15</b> | 72.79        | <b>73.34</b> |
|                | <b>Average</b>        | 30.33        | <b>32.94</b> | 41.08        | <b>48.38</b> | 46.30        | <b>47.38</b> | 53.72        | <b>55.15</b> | 60.31        | <b>64.71</b> | 75.73        | <b>77.67</b> |
| Spanish        | HeadQA                | 33.77        | <b>34.32</b> | 48.21        | <b>54.47</b> | 53.79        | <b>55.54</b> | 59.66        | <b>61.24</b> | 64.77        | <b>68.00</b> | 81.44        | <b>82.44</b> |
|                | MedExpQA              | 21.60        | <b>23.00</b> | 32.80        | <b>38.40</b> | <b>46.40</b> | 40.40        | 40.00        | <b>43.00</b> | <b>52.80</b> | 52.40        | 73.60        | <b>76.60</b> |
|                | Anatomy               | 37.78        | <b>39.08</b> | 42.22        | <b>51.11</b> | 45.93        | <b>49.63</b> | 48.15        | <b>52.96</b> | 60.74        | <b>62.22</b> | 71.11        | <b>74.44</b> |
|                | Clinical Knowledge    | 37.74        | <b>38.78</b> | 53.96        | <b>55.47</b> | 54.34        | <b>56.13</b> | 58.49        | <b>62.08</b> | <b>68.68</b> | 68.40        | 78.49        | <b>80.00</b> |
|                | College Biology       | 29.17        | <b>35.94</b> | 48.61        | <b>50.35</b> | 55.56        | <b>56.25</b> | 54.86        | <b>55.04</b> | 66.67        | <b>69.10</b> | <b>85.42</b> | 84.20        |
|                | College Medicine      | 32.37        | <b>34.39</b> | 43.93        | <b>48.84</b> | <b>54.34</b> | 48.99        | 49.71        | <b>54.05</b> | <b>59.54</b> | 58.24        | 69.94        | <b>72.97</b> |
|                | Medical Genetics      | 32.00        | <b>34.75</b> | 46.00        | <b>59.50</b> | 53.00        | <b>57.25</b> | <b>72.00</b> | 68.00        | <b>67.00</b> | 66.75        | 86.00        | <b>86.75</b> |
|                | Professional Medicine | 26.47        | <b>30.06</b> | 38.24        | <b>43.56</b> | <b>47.06</b> | 45.68        | <b>51.84</b> | 50.74        | 53.68        | <b>56.90</b> | <b>69.49</b> | 68.94        |
| <b>Average</b> | 31.36                 | <b>33.79</b> | 44.25        | <b>50.21</b> | <b>51.30</b> | 51.23        | 54.34        | <b>55.89</b> | 61.74        | <b>62.75</b> | 76.94        | <b>78.29</b> |              |

Table 2: **MedPodGPT’s performance on multilingual medical QA benchmarks.** All the models were fine-tuned with English, French, and Spanish medical podcast data and evaluated on various medical QA benchmarks in three in-domain languages. Benchmarks included MedExpQA, MedMCQA, MedQA, PubMedQA, HeadQA, and MMLU medical and clinical topics (covering anatomy, clinical knowledge, college biology, college medicine, medical genetics, and professional medicine). The baseline model’s performance was compared with our MedPodGPT (indicated as *Ours*). The superior performances of MedPodGPT highlight the effectiveness of incorporating podcast data into the training process. The numbers in bold font indicate the best-performing model in each category.

| Language | Benchmark Datasets           | Model          |              |              |              |              |              |              |              |              |              |              |              |
|----------|------------------------------|----------------|--------------|--------------|--------------|--------------|--------------|--------------|--------------|--------------|--------------|--------------|--------------|
|          |                              | Gemma 2B       |              | Gemma 7B     |              | Mistral 7B   |              | LLaMA 3 8B   |              | Mixtral MoE  |              | LLaMA 3 70B  |              |
|          |                              | Baseline       | <i>Ours</i>  | Baseline     | <i>Ours</i>  | Baseline     | <i>Ours</i>  | Baseline     | <i>Ours</i>  | Baseline     | <i>Ours</i>  | Baseline     | <i>Ours</i>  |
| Chinese  | MedQA-MCMLE                  | 33.39          | <b>33.43</b> | 40.51        | <b>45.98</b> | 39.67        | <b>39.25</b> | 63.63        | <b>66.32</b> | 45.80        | <b>47.14</b> | <b>84.68</b> | 83.73        |
|          | Anatomy                      | <b>28.38</b>   | 23.98        | 25.00        | <b>31.59</b> | 25.00        | <b>30.41</b> | 33.78        | <b>35.98</b> | <b>33.11</b> | 26.35        | 63.51        | <b>64.02</b> |
|          | Clinical Knowledge           | <b>29.11</b>   | 28.27        | 31.22        | <b>39.87</b> | 33.33        | <b>32.60</b> | 49.37        | <b>50.95</b> | <b>39.24</b> | 38.61        | 71.73        | <b>71.94</b> |
|          | College Medicine             | 28.94          | <b>32.23</b> | 33.70        | <b>36.08</b> | <b>30.77</b> | 30.68        | 52.01        | <b>56.50</b> | 38.46        | <b>40.94</b> | 75.82        | <b>80.49</b> |
|          | Medical Genetics             | 32.39          | <b>32.39</b> | 43.75        | <b>45.17</b> | 38.64        | <b>42.33</b> | 43.18        | <b>44.60</b> | 45.45        | <b>45.88</b> | <b>61.36</b> | 57.53        |
|          | Medical Nutrition            | 33.79          | <b>35.69</b> | 40.69        | <b>44.66</b> | <b>42.07</b> | 37.24        | <b>53.10</b> | 50.00        | 49.66        | <b>51.90</b> | 66.21        | <b>68.28</b> |
|          | Traditional Chinese Medicine | 27.57          | <b>28.52</b> | 31.35        | <b>36.35</b> | 24.86        | <b>28.52</b> | <b>43.24</b> | 39.46        | 30.27        | <b>30.94</b> | 66.49        | <b>67.98</b> |
|          | Virology                     | <b>37.28</b>   | 36.98        | 46.15        | <b>54.44</b> | 43.79        | <b>48.22</b> | <b>59.76</b> | 58.88        | <b>53.25</b> | 50.15        | 76.33        | <b>77.51</b> |
|          | <b>Average</b>               | 31.36          | <b>31.44</b> | 36.55        | <b>41.77</b> | 34.77        | <b>36.16</b> | 49.76        | <b>50.34</b> | <b>41.91</b> | 41.49        | 70.77        | <b>71.44</b> |
| Hindi    | Anatomy                      | 25.93          | <b>32.22</b> | 34.07        | <b>36.86</b> | 23.70        | <b>30.00</b> | <b>40.00</b> | 35.18        | 31.11        | <b>34.44</b> | 52.59        | <b>57.78</b> |
|          | Clinical Knowledge           | 26.42          | <b>28.96</b> | <b>41.89</b> | 41.04        | 24.91        | <b>35.85</b> | <b>48.30</b> | 46.70        | <b>38.11</b> | 36.70        | 63.40        | <b>69.06</b> |
|          | College Biology              | 26.39          | <b>33.16</b> | 26.39        | <b>34.03</b> | 19.44        | <b>28.47</b> | 32.65        | <b>37.16</b> | <b>30.56</b> | 32.81        | 58.33        | <b>68.06</b> |
|          | College Medicine             | 24.86          | <b>27.60</b> | 42.20        | <b>43.35</b> | 23.12        | <b>33.09</b> | 41.04        | <b>43.64</b> | 27.17        | <b>33.24</b> | 60.69        | <b>64.74</b> |
|          | Medical Genetics             | <b>31.00</b>   | 30.50        | 36.00        | <b>41.75</b> | 28.00        | <b>29.25</b> | <b>46.00</b> | 45.75        | 40.00        | <b>43.25</b> | 71.00        | <b>77.00</b> |
|          | Professional Medicine        | 25.37          | <b>26.19</b> | 30.88        | <b>41.08</b> | 22.06        | <b>28.67</b> | 36.40        | <b>39.34</b> | 29.41        | <b>29.50</b> | 45.59        | <b>64.70</b> |
|          |                              | <b>Average</b> | 26.66        | <b>29.77</b> | 35.24        | <b>39.69</b> | 23.54        | <b>30.89</b> | 40.73        | <b>41.29</b> | 32.73        | <b>34.99</b> | 58.60        |

**Table 3: MedPodGPT’s zero-shot performance on non-English medical QA benchmarks.** All models were fine-tuned using English, French, and Spanish medical podcast data and assessed on cross-lingual medical QA benchmarks, including Mandarin and Hindi. Benchmarks included MedQA-MCMLE and multiple categories within MMLU and CMMLU medical and clinical topics, covering anatomy, clinical knowledge, college medicine, medical genetics, medical nutrition, traditional Chinese medicine, virology, and professional medicine. The baseline model’s performance was compared with the performance of our model, MedPodGPT (indicated as *Ours*). Model performances are displayed to demonstrate the effectiveness of integrating podcast data into the training process. The numbers in bold font indicate the better-performing model in each category.
